# Supplementary material for: CENPO Drives Cutaneous Squamous Cell Carcinoma Metastasis via BIRC5- Dependent Glycolytic Regulation
Source: Research Square preprint supplement (doi:10.21203/rs.3.rs-7186117/v1), 2025-08-11
Supplement: Supplementary file 1 [file 7a87a7680d44a5462f4ee960.pdf]

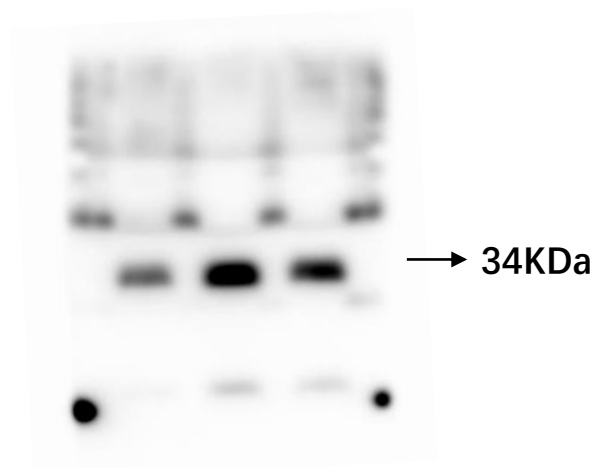

Figure 1E-CENPO

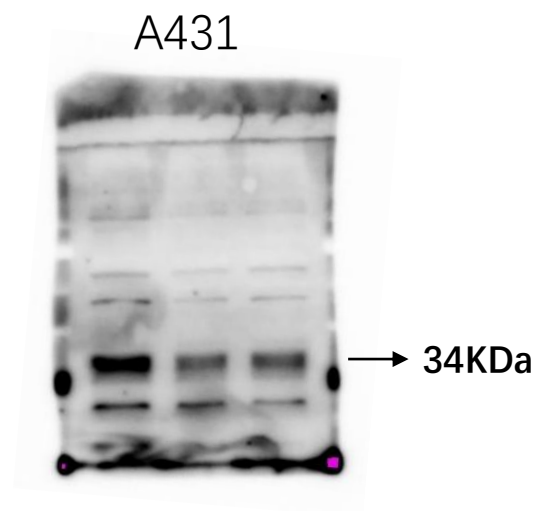

Figure 1H-CENPO

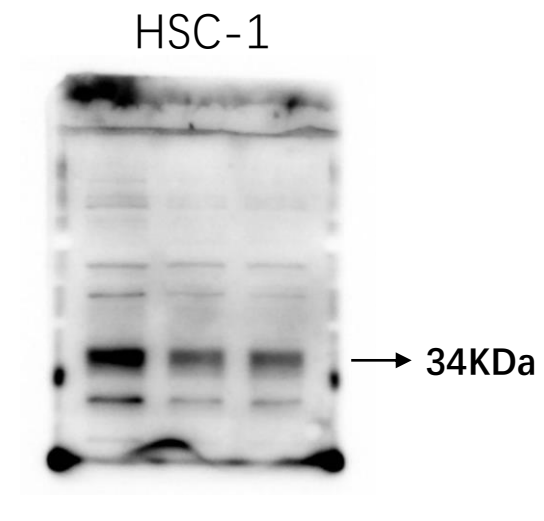

Figure 1H-CENPO

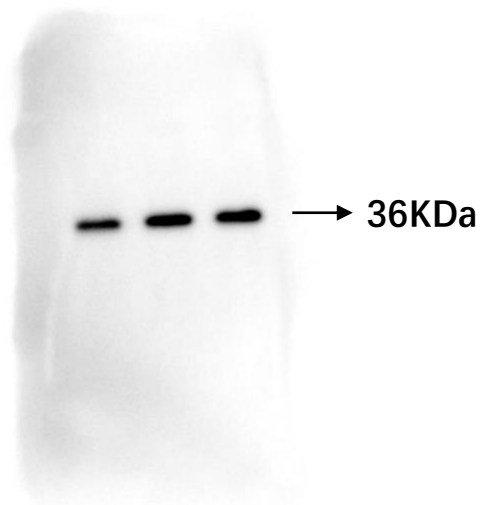

Figure 1E-GAPDH

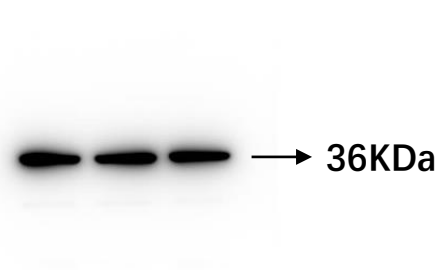

Figure 1H-GAPDH

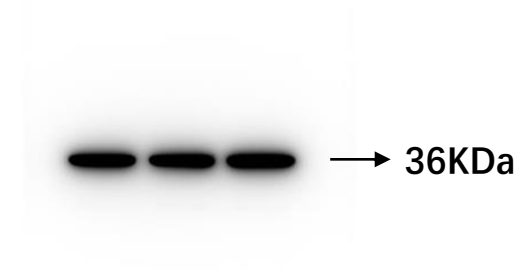

Figure 1H-GAPDH

**A431**



→ 16KDa

This Western blot shows four lanes for BIRC5 protein in A431 cells. The first lane contains a molecular weight marker. The subsequent three lanes show bands of approximately 16 kDa, indicating consistent protein levels across the samples.

Figure 3F-BIRC5



→ 34KDa

This Western blot shows four lanes for CENPO protein in A431 cells. The first lane contains a molecular weight marker. The subsequent three lanes show bands of approximately 34 kDa, indicating consistent protein levels across the samples.

Figure 3F-CENPO



→ 36KDa

This Western blot shows four lanes for GAPDH protein in A431 cells. The first lane contains a molecular weight marker. The subsequent three lanes show bands of approximately 36 kDa, indicating consistent protein levels across the samples.

Figure 3F-GAPDH

**HSC-1**



→ 16KDa

This Western blot shows four lanes for BIRC5 protein in HSC-1 cells. The first lane contains a molecular weight marker. The subsequent three lanes show bands of approximately 16 kDa, indicating consistent protein levels across the samples.

Figure 3F-BIRC5



→ 34KDa

This Western blot shows four lanes for CENPO protein in HSC-1 cells. The first lane contains a molecular weight marker. The subsequent three lanes show bands of approximately 34 kDa, indicating consistent protein levels across the samples.

Figure 3F-CENPO



→ 36KDa

This Western blot shows four lanes for GAPDH protein in HSC-1 cells. The first lane contains a molecular weight marker. The subsequent three lanes show bands of approximately 36 kDa, indicating consistent protein levels across the samples.

Figure 3F-GAPDH

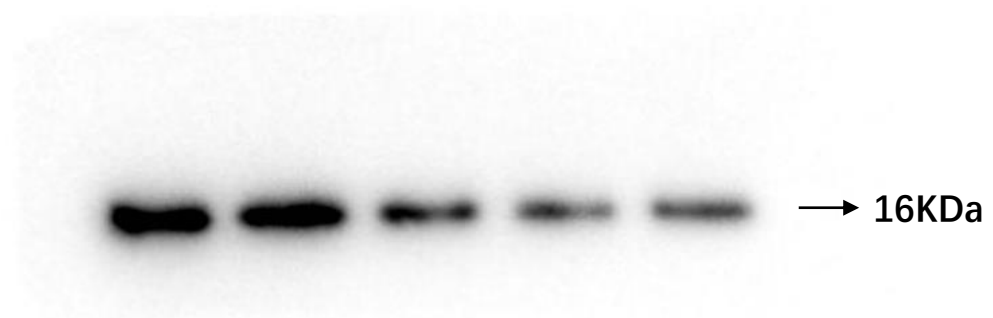

Figure 4B-BIRC5

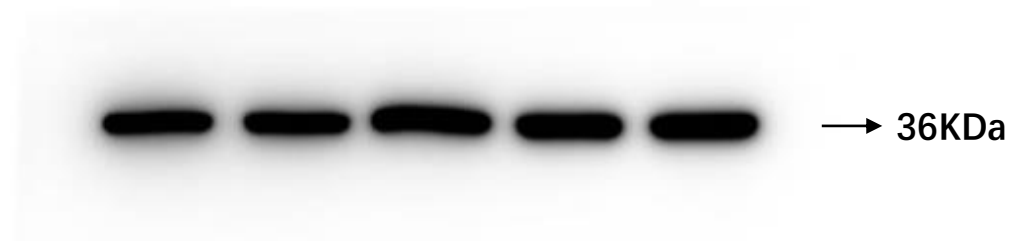

Figure 4B-GAPDH

A431

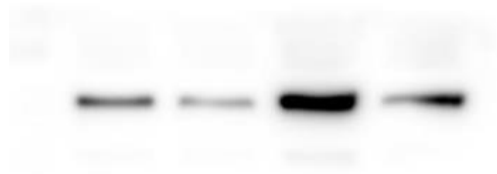

Figure 5G-GLUT3

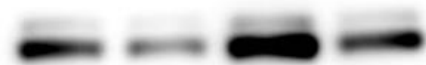

Figure 5G-HK2

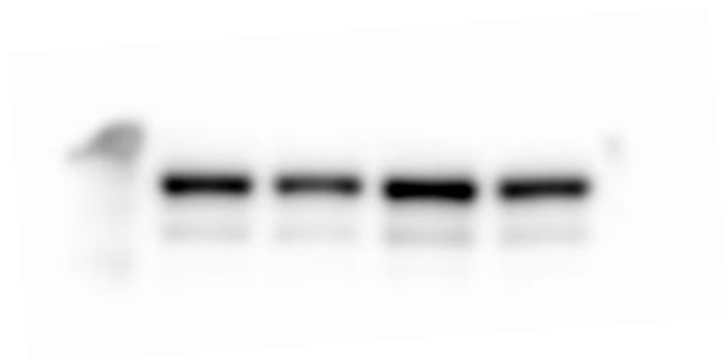

Figure 5G-PKM2

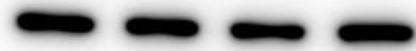

Figure 5G-β-Actin

HSC-1

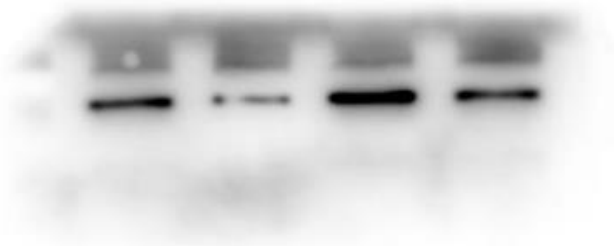

Figure 5G-GLUT3

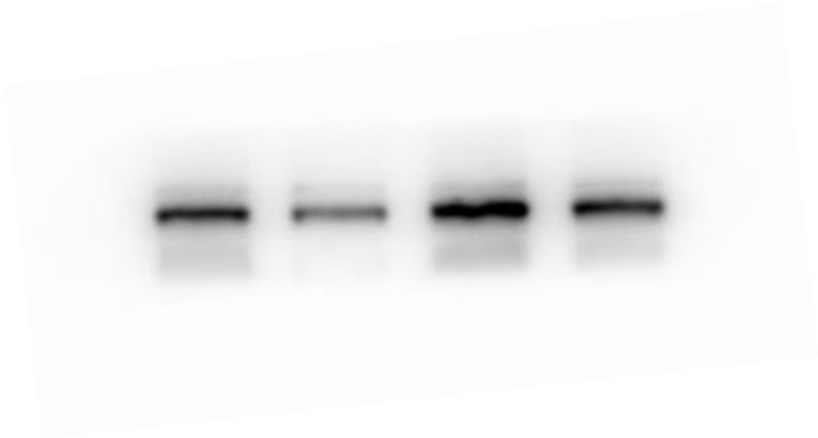

Figure 5G-HK2

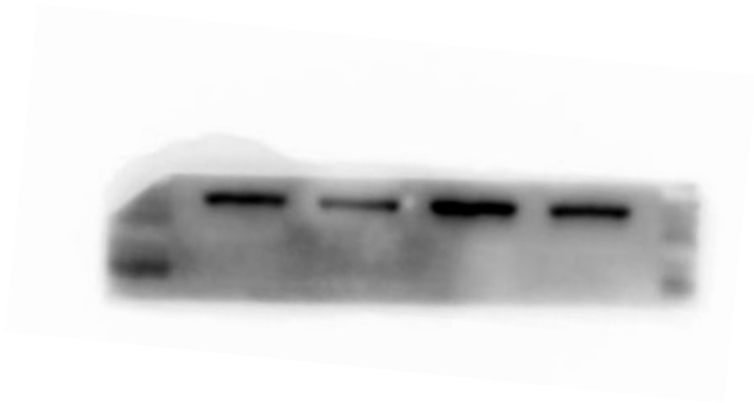

Figure 5G-PKM2

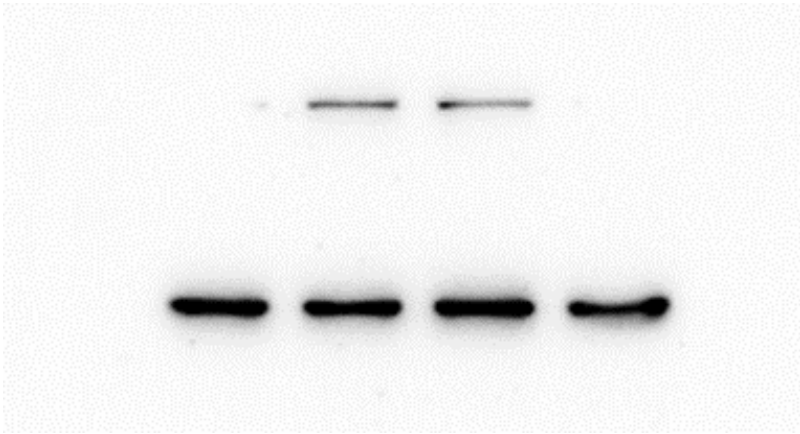

Figure 5G-β-Actin
