# Supplementary material for: CENPO Drives Cutaneous Squamous Cell Carcinoma Metastasis via BIRC5- Dependent Glycolytic Regulation
Source: Research Square preprint supplement (doi:10.21203/rs.3.rs-7186117/v1), 2025-08-11

**Graphical abstract**

Cutaneous squamous cell carcinoma (cSCC) is the second skin tumor. The CENPO is overexpression in cSCC. With CENPO knockdown, the cells proliferation, migration, and invasion were suppressed in cSCC. Following the knockdown of CENPO, the levels of BIRC5 were significantly inhibited. With CENPO or BIRC5 silencing, the glycolysis indexes OCR was increase, and the ECAR, Glucose, pyruvate, lactic and ATP levels were decreased *in vivo and in vitro*. In summary, CENPO could enhance the cell proliferation activities, migration and invasion through the BIRC5-associated aerobic glycolysis pathway in cSCC.


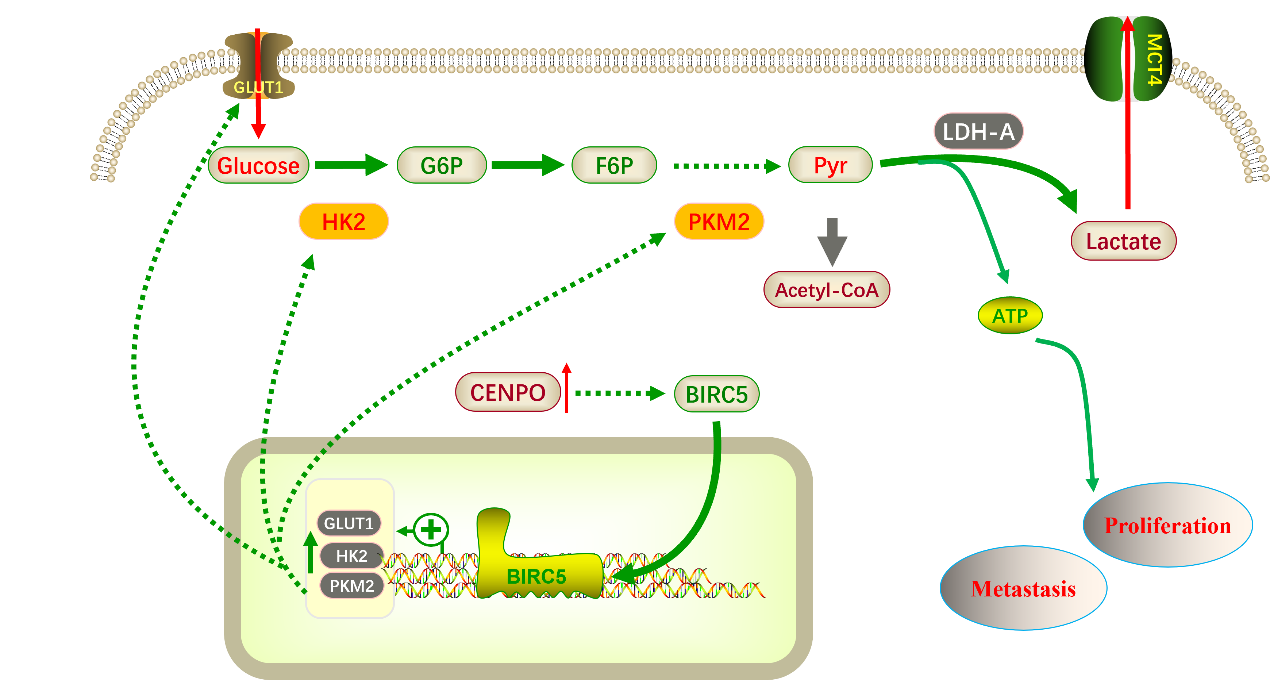

Supplement: Supplementary file 1 [file 4861c8aa8090ac6961ca2438.docx]
